# Supplementary material for: Machine learning encodes urine and serum metabolic patterns for autoimmune disease discrimination, classification and metabolic dysregulation analysis
Source: Royal Society of Chemistry journal article supplement (doi:10.1039/d3an01051a), 2023-01-01
Supplement: d3an01051a1.pdf [file d3an01051a1.pdf]

## Supplementary Material for

# Machine learning encodes urine and serum metabolic patterns for autoimmune diseases discrimination, classification and metabolic dysregulation analysis

Qiuyao Du<sup>a,b</sup>, Xiao Wang<sup>a,b</sup>, Junyu Chen<sup>a,b</sup>, Yiran Wang<sup>a,b</sup>, Wenlan Liu<sup>c</sup>, Liping Wang<sup>c</sup>, Huihui Liu<sup>a,b,\*</sup>, Lixia Jiang<sup>d,\*</sup> & Zongxiu Nie<sup>a,b,\*</sup>

<sup>a</sup>Beijing National Laboratory for Molecular Sciences, Key Laboratory of Analytical Chemistry for Living Biosystems, Institute of Chemistry, Chinese Academy of Sciences, Beijing 100190, China.

<sup>b</sup>University of Chinese Academy of Sciences, Beijing 100049, China.

<sup>c</sup>Shenzhen Second People's Hospital, The First Affiliated Hospital of Shenzhen University, Shenzhen 518000, China.

<sup>d</sup>Department of Laboratory Medicine, First Affiliated Hospital of Gannan Medical University, Ganzhou, Jiangxi Province 341000, China.

Correspondence should be addressed to Huihui Liu; [hhliu@iccas.ac.cn](mailto:hhliu@iccas.ac.cn), Lixia Jiang; [jlx7310@gmu.edu.cn](mailto:jlx7310@gmu.edu.cn) and Zongxiu Nie; [znie@iccas.ac.cn](mailto:znie@iccas.ac.cn)

This part included:

Data processing and statistical analysis

Figures S1-S3

Tables S1-S23

## Data processing and statistical analysis

Data extraction and alignment were carried out using MZmine-2.53, which was obtained at <https://github.com/mzmine/mzmine2/releases/>. The mass detection was performed on raw data and exact masses with mass level 1 by keeping the noise level at 3,000. Chromatograms were built using an ADAP module with a minimum height of 3,000, and  $m/z$  tolerance of 0.05 (or 20 ppm). For the chromatogram deconvolution, the local minimum search algorithm was used with the following settings: chromatographic threshold = 5%, minimum retention time range = 0.50 min, minimum relative height = 30%, minimum absolute height = 10,000, minimum ratio of the peak top/edge = 1.3, and peak duration range = 0.0-50.0 min<sup>1</sup>. After processing the HPLC-MS data, a total of 7326 RT- $m/z$  ion peaks were found in urine samples and 6145 peaks in serum samples. The number of occurrences of each  $m/z$  in all spectra was calculated, and those less than 2/3 were eliminated. After selection, 572  $m/z$  features of ion peaks for each spectrum of urine samples and 543  $m/z$  features for serum samples were used as a basis for subsequent statistical analysis.

Machine learning was carried out with the Orange 3.31.1 module in Python 3.7. The build-in classifier neural network (NN), random forest (RF), logistic regression (LR), naive bayes (NB), support vector machine (SVM), adaboost (AB) and k-nearest neighbor (kNN) were applied. Model parameters were set as follows: NN: Hidden layers: 100, Activation: ReLu, Solver: Adam, Alpha: 0.0001, Max iterations: 200, Replicable training: True. RF: Number of trees: 10, Maximal number of considered features: unlimited, Replicable training: No, Maximal tree depth: unlimited, Stop splitting nodes with maximum instances: 5. LR: Regularization: Ridge (L2), C=1, class weights=False. NB: No additional parameter settings are performed. SVM: SVM type: SVM, C=1.0,  $\epsilon=0.1$ , Kernel: RBF,  $\exp(-\text{auto}|x-y|^2)$ , Numerical tolerance: 0.001, Iteration limit: 100. AB: Base estimator: tree, Number of estimators: 50, Algorithm (classification): Samme.r, Loss (regression): Linear. kNN: Number of neighbours: 5, Metric: Euclidean, Weight: Uniform.

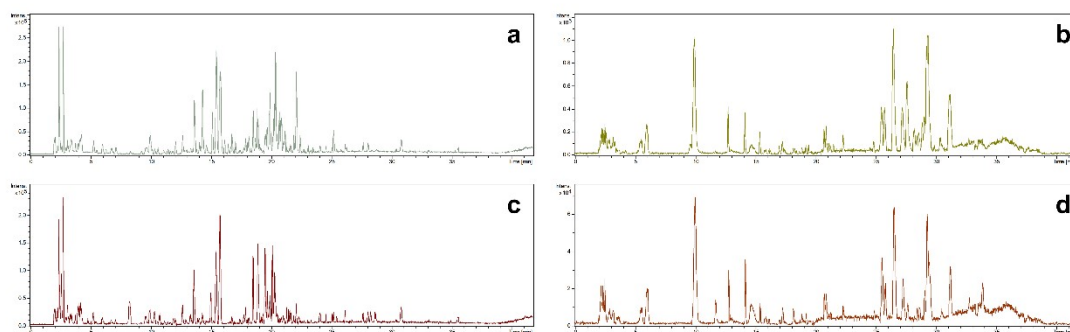

**Figure S1.** Total ion chromatograms (TIC) of healthy controls (HC) (a) and autoimmune diseases (ADs) patients (c) from urine samples; TIC of HC (b) and ADs patients (d) from serum samples.

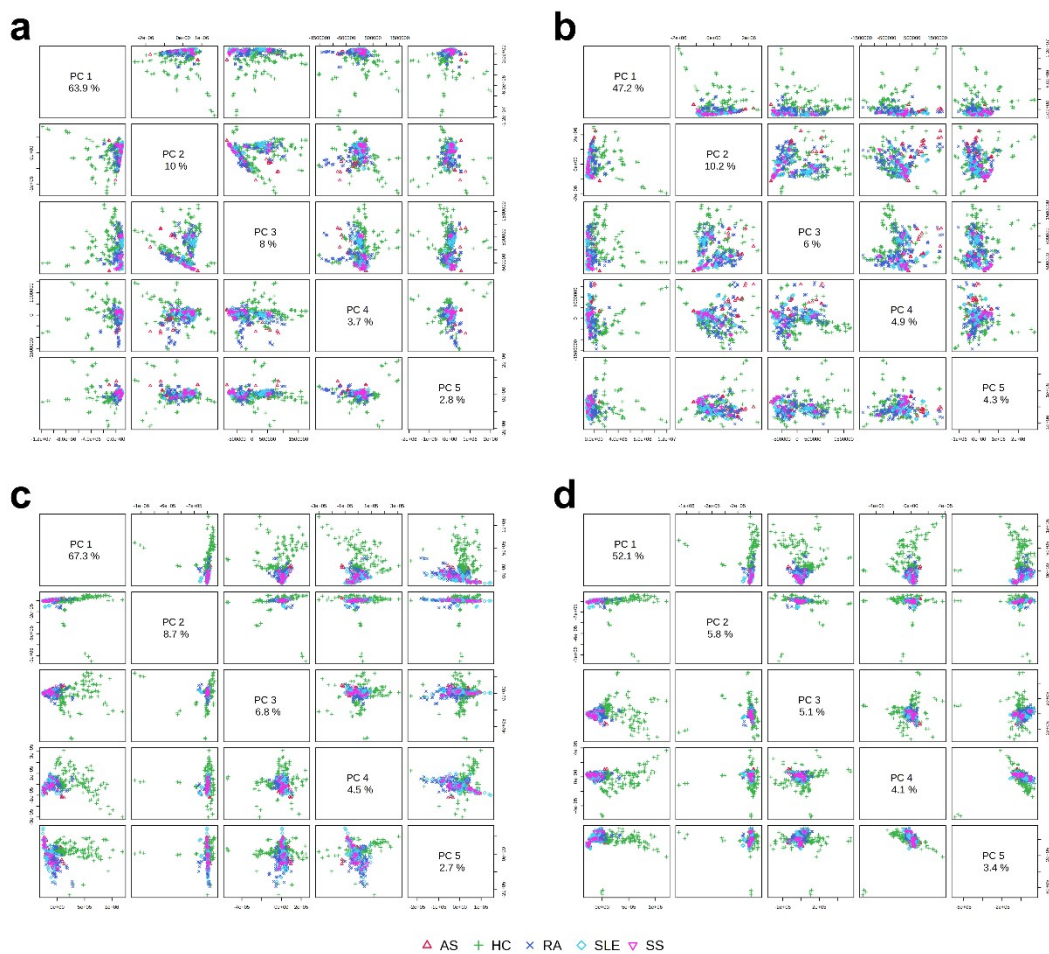

**Figure S2.** Overview of principal component analysis (PCA) results in the classification of autoimmune diseases (ADs) and healthy controls (HC). AS (ankylosing spondylitis), RA (rheumatoid arthritis), SLE (systemic lupus erythematosus), SS (sicca syndrome). PCA results with differential metabolites (a), and all  $m/z$  features (c) in urine samples; PCA results with differential metabolites (b), and all  $m/z$  features (d) in serum samples.

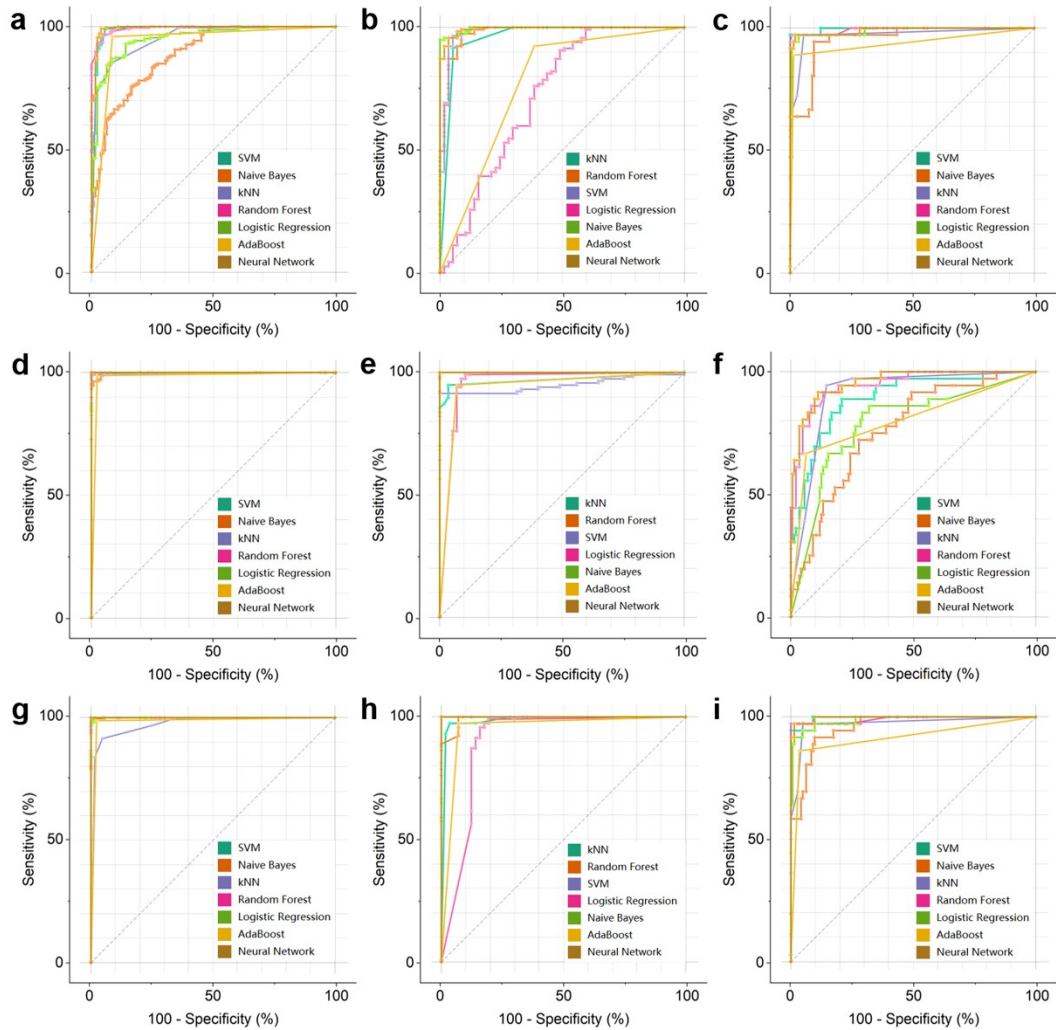

**Figure S3.** ROC curves of different classifiers with metabolites panels. ROC curves for autoimmune diseases (ADs) versus healthy controls (HC) in training cohort (a), testing cohort (b), and the classification of ADs and HC (AS vs SS vs SLE vs RA vs HC) (c) of metabolites panel with urine samples; ROC curves for ADs versus HC in training cohort (d), testing cohort (e), and the classification of ADs and HC (AS vs SS vs SLE vs RA vs HC) (f) of metabolites panel with serum samples; ROC curves for ADs versus HC in training cohort (g), testing cohort (h), and the classification of ADs and HC (AS vs SS vs SLE vs RA vs HC) (i) of metabolites panel with fusion model. AS (ankylosing spondylitis), SS (sicca syndrome), SLE (systemic lupus erythematosus), RA (rheumatoid arthritis).

**Table S1** Age and gender distribution of study participants.

| Groups              | Number | Age  |       |       |       |       |     | Gender |        |
|---------------------|--------|------|-------|-------|-------|-------|-----|--------|--------|
|                     |        | < 30 | 30-39 | 40-49 | 50-59 | 60-69 | ≥70 | Male   | Female |
| Healthy controls    | 62     | 8    | 5     | 14    | 19    | 8     | 8   | 28     | 34     |
| Autoimmune diseases | 121    | 11   | 12    | 21    | 40    | 19    | 18  | 39     | 82     |

**Table S2** Metrics of classifiers for autoimmune diseases versus healthy controls (ADs vs HC) with

urine samples by LC-MS (training cohort).

| Model                  | AUC   | Accuracy | F1    | Precision | Recall |
|------------------------|-------|----------|-------|-----------|--------|
| Logistic Regression    | 1.000 | 1.000    | 1.000 | 1.000     | 1.000  |
| Neural Network         | 1.000 | 0.997    | 0.997 | 0.997     | 0.997  |
| Support Vector Machine | 1.000 | 0.997    | 0.997 | 0.997     | 0.997  |
| Random Forest          | 1.000 | 0.997    | 0.997 | 0.997     | 0.997  |
| AdaBoost               | 0.996 | 0.997    | 0.997 | 0.997     | 0.997  |
| Naive Bayes            | 0.995 | 0.957    | 0.957 | 0.958     | 0.957  |
| k-Nearest Neighbor     | 0.968 | 0.861    | 0.857 | 0.862     | 0.861  |

**Table S3** Metrics of classifiers for autoimmune diseases versus healthy controls (ADs vs HC) with urine samples by LC-MS (testing cohort).

| Model                  | AUC   | Accuracy | F1    | Precision | Recall |
|------------------------|-------|----------|-------|-----------|--------|
| Naive Bayes            | 1.000 | 0.989    | 0.988 | 0.989     | 0.989  |
| Neural Network         | 1.000 | 0.960    | 0.959 | 0.962     | 0.960  |
| Support Vector Machine | 0.995 | 0.828    | 0.807 | 0.863     | 0.828  |
| Random Forest          | 0.980 | 0.862    | 0.850 | 0.886     | 0.862  |
| k-Nearest Neighbor     | 0.924 | 0.897    | 0.891 | 0.910     | 0.897  |
| Logistic Regression    | 0.861 | 0.833    | 0.830 | 0.830     | 0.833  |
| AdaBoost               | 0.614 | 0.747    | 0.688 | 0.816     | 0.747  |

**Table S4** Metrics of classifiers for autoimmune diseases versus healthy controls (ADs vs HC) with serum samples by LC-MS (training cohort).

| Model                  | AUC   | Accuracy | F1    | Precision | Recall |
|------------------------|-------|----------|-------|-----------|--------|
| Random Forest          | 1.000 | 1.000    | 1.000 | 1.000     | 1.000  |
| Logistic Regression    | 1.000 | 0.997    | 0.997 | 0.997     | 0.997  |
| Support Vector Machine | 1.000 | 0.995    | 0.995 | 0.995     | 0.995  |
| k-Nearest Neighbor     | 1.000 | 0.984    | 0.984 | 0.985     | 0.984  |
| Neural Network         | 0.999 | 0.995    | 0.995 | 0.995     | 0.995  |
| Naive Bayes            | 0.979 | 0.957    | 0.958 | 0.960     | 0.957  |
| AdaBoost               | 0.978 | 0.981    | 0.981 | 0.981     | 0.981  |

**Table S5** Metrics of classifiers for autoimmune diseases versus healthy controls (ADs vs HC) with serum samples by LC-MS (testing cohort).

| Model                  | AUC   | Accuracy | F1    | Precision | Recall |
|------------------------|-------|----------|-------|-----------|--------|
| Neural Network         | 0.999 | 0.862    | 0.866 | 0.903     | 0.862  |
| AdaBoost               | 0.987 | 0.983    | 0.983 | 0.984     | 0.983  |
| Logistic Regression    | 0.982 | 0.943    | 0.943 | 0.945     | 0.943  |
| k-Nearest Neighbor     | 0.972 | 0.885    | 0.888 | 0.910     | 0.885  |
| Random Forest          | 0.972 | 0.845    | 0.849 | 0.878     | 0.845  |
| Support Vector Machine | 0.874 | 0.759    | 0.759 | 0.759     | 0.759  |
| Naive Bayes            | 0.808 | 0.713    | 0.717 | 0.847     | 0.713  |

**Table S6** Metrics of classifiers for autoimmune diseases versus healthy controls (ADs vs HC) with

fusion model by LC-MS (training cohort).

| Model                  | AUC   | Accuracy | F1    | Precision | Recall |
|------------------------|-------|----------|-------|-----------|--------|
| Random Forest          | 1.000 | 1.000    | 1.000 | 1.000     | 1.000  |
| Support Vector Machine | 1.000 | 1.000    | 1.000 | 1.000     | 1.000  |
| Neural Network         | 1.000 | 0.997    | 0.997 | 0.997     | 0.997  |
| Logistic Regression    | 1.000 | 0.997    | 0.997 | 0.997     | 0.997  |
| Naive Bayes            | 0.990 | 0.987    | 0.987 | 0.987     | 0.987  |
| AdaBoost               | 0.982 | 0.984    | 0.984 | 0.984     | 0.984  |
| k-Nearest Neighbor     | 0.977 | 0.885    | 0.882 | 0.887     | 0.885  |

**Table S7** Metrics of classifiers for autoimmune diseases versus healthy controls (ADs vs HC) with fusion model by LC-MS (testing cohort).

| Model                  | AUC   | Accuracy | F1    | Precision | Recall |
|------------------------|-------|----------|-------|-----------|--------|
| Random Forest          | 1.000 | 0.989    | 0.989 | 0.989     | 0.989  |
| Neural Network         | 1.000 | 0.868    | 0.872 | 0.906     | 0.868  |
| AdaBoost               | 0.987 | 0.983    | 0.983 | 0.984     | 0.983  |
| Support Vector Machine | 0.978 | 0.948    | 0.949 | 0.955     | 0.948  |
| Logistic Regression    | 0.977 | 0.948    | 0.949 | 0.950     | 0.948  |
| k-Nearest Neighbor     | 0.963 | 0.954    | 0.953 | 0.957     | 0.954  |
| Naive Bayes            | 0.850 | 0.799    | 0.805 | 0.875     | 0.799  |

**Table S8** Metrics of classifiers for the distinction of four autoimmune diseases (ADs) and healthy controls (HC) with urine samples by LC-MS.

| Model                  | AUC   | Accuracy | F1    | Precision | Recall |
|------------------------|-------|----------|-------|-----------|--------|
| Random Forest          | 1.000 | 0.989    | 0.989 | 0.989     | 0.989  |
| Support Vector Machine | 0.999 | 0.928    | 0.926 | 0.937     | 0.928  |
| Logistic Regression    | 0.998 | 0.983    | 0.983 | 0.983     | 0.983  |
| Neural Network         | 0.996 | 0.994    | 0.994 | 0.995     | 0.994  |
| AdaBoost               | 0.983 | 0.972    | 0.972 | 0.973     | 0.972  |
| Naive Bayes            | 0.965 | 0.822    | 0.822 | 0.829     | 0.822  |
| k-Nearest Neighbor     | 0.959 | 0.678    | 0.679 | 0.686     | 0.678  |

AS vs SS vs SLE vs RA vs HC, AS: ankylosing spondylitis, SS: sicca syndrome, SLE: systemic lupus erythematosus, RA: rheumatoid arthritis.

**Table S9** Metrics of classifiers for the distinction of four autoimmune diseases (ADs) and healthy

controls (HC) with serum samples by LC-MS.

| Model                  | AUC   | Accuracy | F1    | Precision | Recall |
|------------------------|-------|----------|-------|-----------|--------|
| Logistic Regression    | 0.993 | 0.967    | 0.967 | 0.967     | 0.967  |
| Neural Network         | 0.993 | 0.956    | 0.955 | 0.957     | 0.956  |
| Support Vector Machine | 0.989 | 0.878    | 0.875 | 0.882     | 0.878  |
| Random Forest          | 0.976 | 0.894    | 0.895 | 0.900     | 0.894  |
| k-Nearest Neighbor     | 0.953 | 0.689    | 0.685 | 0.695     | 0.689  |
| Naive Bayes            | 0.915 | 0.706    | 0.699 | 0.726     | 0.706  |
| AdaBoost               | 0.865 | 0.783    | 0.782 | 0.785     | 0.783  |

AS vs SS vs SLE vs RA vs HC, AS: ankylosing spondylitis, SS: sicca syndrome, SLE: systemic lupus erythematosus, RA: rheumatoid arthritis.

**Table S10** Metrics of classifiers for the distinction of four autoimmune diseases (ADs) and healthy controls (HC) with fusion model by LC-MS.

| Model                  | AUC   | Accuracy | F1    | Precision | Recall |
|------------------------|-------|----------|-------|-----------|--------|
| Naive Bayes            | 1.000 | 0.981    | 0.981 | 0.983     | 0.981  |
| Random Forest          | 0.997 | 0.962    | 0.962 | 0.962     | 0.962  |
| Logistic Regression    | 0.996 | 0.990    | 0.990 | 0.991     | 0.990  |
| Support Vector Machine | 0.990 | 0.876    | 0.880 | 0.924     | 0.876  |
| k-Nearest Neighbor     | 0.951 | 0.657    | 0.655 | 0.690     | 0.657  |
| AdaBoost               | 0.935 | 0.895    | 0.895 | 0.896     | 0.895  |
| Neural Network         | 0.865 | 0.886    | 0.883 | 0.895     | 0.886  |

AS vs SS vs SLE vs RA vs HC, AS: ankylosing spondylitis, SS: sicca syndrome, SLE: systemic lupus erythematosus, RA: rheumatoid arthritis.

**Table S11** Differential metabolites annotated in urine samples.

| Experimental <i>m/z</i> | Theoretical <i>m/z</i> | Delta (ppm) | Formula                                                        | Adduct                                             | Compound Name                               | Identification Database |
|-------------------------|------------------------|-------------|----------------------------------------------------------------|----------------------------------------------------|---------------------------------------------|-------------------------|
| 205.0969                | 205.0972               | 1.4209      | C <sub>11</sub> H <sub>12</sub> N <sub>2</sub> O <sub>2</sub>  | [M+H] <sup>+</sup>                                 | L-Tryptophan                                | HMDB0000929             |
| 207.1103                | 207.1104               | 0.5286      | C <sub>7</sub> H <sub>13</sub> NO <sub>2</sub>                 | [M+ACN+Na] <sup>+</sup>                            | Proline betaine                             | HMDB0004827             |
| 211.0574                | 211.0585               | 4.9780      | C <sub>4</sub> H <sub>10</sub> N <sub>3</sub> O <sub>5</sub> P | [M+NH <sub>4</sub> -H <sub>2</sub> O] <sup>+</sup> | Phosphocreatine                             | HMDB0001511             |
| 211.1694                | 211.1693               | 0.4881      | C <sub>13</sub> H <sub>22</sub> O <sub>2</sub>                 | [M+H] <sup>+</sup>                                 | Methyl (2E,6Z)-dodecadienoate               | HMDB0031014             |
| 218.0121                | 218.0112               | 4.1292      | C <sub>7</sub> H <sub>6</sub> O <sub>6</sub> S                 | [M+NH <sub>4</sub> -H <sub>2</sub> O] <sup>+</sup> | 5-Sulfosalicylic acid                       | HMDB0011725             |
| 221.0919                | 221.0921               | 0.6809      | C <sub>11</sub> H <sub>12</sub> N <sub>2</sub> O <sub>3</sub>  | [M+H] <sup>+</sup>                                 | 5-Hydroxy-L-tryptophan                      | HMDB0000472             |
| 225.1094                | 225.1090               | 1.8014      | C <sub>8</sub> H <sub>17</sub> NOS <sub>2</sub>                | [M+NH <sub>4</sub> ] <sup>+</sup>                  | Dihydrolipoamide                            | HMDB0000985             |
| 227.1251                | 227.1254               | 1.2909      | C <sub>10</sub> H <sub>20</sub> O <sub>4</sub>                 | [M+Na] <sup>+</sup>                                | 3,7-Dimethyl-3-octene-1,2,6,7-tetrol        | HMDB0035133             |
| 229.1541                | 229.1547               | 2.7580      | C <sub>11</sub> H <sub>20</sub> N <sub>2</sub> O <sub>3</sub>  | [M+H] <sup>+</sup>                                 | Isoleucylproline                            | HMDB0011174             |
| 231.1588                | 231.1591               | 1.3055      | C <sub>12</sub> H <sub>22</sub> O <sub>4</sub>                 | [M+H] <sup>+</sup>                                 | Dodecanedioic acid                          | HMDB0000623             |
| 241.1544                | 241.1547               | 1.3553      | C <sub>12</sub> H <sub>17</sub> NO <sub>3</sub>                | [M+NH <sub>4</sub> ] <sup>+</sup>                  | Cerulenin                                   | HMDB0015168             |
| 248.2111                | 248.2111               | 0.1014      | C <sub>30</sub> H <sub>58</sub> O <sub>2</sub>                 | [M+2Na] <sup>2+</sup>                              | 28-Methyl-27-nonacosenoic acid              | HMDB0031951             |
| 249.1068                | 249.1070               | 0.7566      | C <sub>4</sub> H <sub>7</sub> N <sub>3</sub> O                 | [2M+Na] <sup>+</sup>                               | Creatinine                                  | HMDB0000562             |
| 249.2143                | 249.2154               | 4.3137      | C <sub>45</sub> H <sub>86</sub> O <sub>6</sub>                 | [M+2H+Na] <sup>3+</sup>                            | TG(19:0/15:0/8:0)                           | HMDB0110080             |
| 267.1630                | 267.1634               | 1.4040      | C <sub>42</sub> H <sub>71</sub> O <sub>12</sub> P              | [M+3H] <sup>3+</sup>                               | PG(16:1(9Z)/PGJ2)                           | HMDB0268691             |
| 271.1648                | 271.1644               | 1.3439      | C <sub>14</sub> H <sub>26</sub> O <sub>2</sub>                 | [M+2Na-H] <sup>+</sup>                             | Myristoleic acid                            | HMDB0002000             |
| 274.1035                | 274.1026               | 3.2291      | C <sub>11</sub> H <sub>19</sub> NO <sub>4</sub>                | [M+2Na-H] <sup>+</sup>                             | Butenylcarnitine                            | HMDB0013126             |
| 286.2010                | 286.2009               | 0.4168      | C <sub>31</sub> H <sub>58</sub> O <sub>6</sub>                 | [M+2Na] <sup>2+</sup>                              | TG(8:0/8:0/12:0)                            | HMDB0072057             |
| 287.2037                | 287.2052               | 5.0997      | C <sub>48</sub> H <sub>88</sub> O <sub>8</sub>                 | [M+3Na] <sup>3+</sup>                              | DG(a-25:0/PGF2alpha/0:0)                    | HMDB0298162             |
| 293.1464                | 293.1461               | 0.9989      | C <sub>40</sub> H <sub>72</sub> O <sub>15</sub> P <sub>2</sub> | [M+2H+Na] <sup>3+</sup>                            | PGP(i-14:0/20:4(6Z,8E,10E,14Z)-2OH(5S,12R)) | HMDB0275029             |
| 300.2169                | 300.2165               | 1.4971      | C <sub>33</sub> H <sub>62</sub> O <sub>6</sub>                 | [M+2Na] <sup>2+</sup>                              | TG(10:0/10:0/10:0)                          | HMDB0000548             |
| 310.2007                | 310.2009               | 0.5009      | C <sub>35</sub> H <sub>58</sub> O <sub>6</sub>                 | [M+2Na] <sup>2+</sup>                              | DG(12:0/20:4(6E,8Z,11Z,14Z))+O(5)/0:0)      | HMDB0294705             |
| 355.1726                | 355.1727               | 0.2607      | C <sub>16</sub> H <sub>28</sub> O <sub>7</sub>                 | [M+Na] <sup>+</sup>                                | 6Z-8-Hydroxygeraniol 8-O-glucoside          | HMDB0035025             |
| 358.2587                | 358.2596               | 2.5191      | C <sub>41</sub> H <sub>72</sub> O <sub>8</sub>                 | [M+H+Na] <sup>2+</sup>                             | DG(18:0/PGE2/0:0)                           | HMDB0295863             |



359.2619      359.2625      1.5800      C<sub>38</sub>H<sub>70</sub>NO<sub>8</sub>P      [M+H+NH<sub>4</sub>]<sup>2+</sup>      PE(15:0/18:3(6Z,9Z,12Z))      HMDB0008896

**Table S12** Differential metabolites annotated in serum samples.

| Experimental<br><i>m/z</i> | Theoretical<br><i>m/z</i> | Delta<br>(ppm) | Formula                                                       | Adduct                                             | Compound Name                                                                     | Identification<br>Database |
|----------------------------|---------------------------|----------------|---------------------------------------------------------------|----------------------------------------------------|-----------------------------------------------------------------------------------|----------------------------|
| 119.0188                   | 119.0190                  | 1.8826         | C <sub>16</sub> H <sub>12</sub> O <sub>8</sub>                | [M+2H+Na] <sup>3+</sup>                            | Patuletin                                                                         | HMDB0030802                |
| 169.0491                   | 169.0495                  | 2.1692         | C <sub>8</sub> H <sub>8</sub> O <sub>4</sub>                  | [M+H] <sup>+</sup>                                 | 3,4-Dihydroxybenzeneacetic acid                                                   | HMDB0001336                |
| 188.0703                   | 188.0706                  | 1.6098         | C <sub>11</sub> H <sub>9</sub> NO <sub>2</sub>                | [M+H] <sup>+</sup>                                 | Indoleacrylic acid                                                                | HMDB0000734                |
| 200.2370                   | 200.2367                  | 1.5720         | C <sub>13</sub> H <sub>28</sub> O                             | [M+NH <sub>4</sub> -H <sub>2</sub> O] <sup>+</sup> | Tridecanol                                                                        | HMDB0013316                |
| 202.0557                   | 202.0565                  | 4.1371         | C <sub>5</sub> H <sub>6</sub> N <sub>4</sub> O <sub>5</sub>   | [M+NH <sub>4</sub> -H <sub>2</sub> O] <sup>+</sup> | 2-Oxo-4-hydroxy-4-carboxy-5-ureidoimidazoline                                     | HMDB0059663                |
| 204.1590                   | 204.1594                  | 2.0507         | C <sub>10</sub> H <sub>18</sub> O <sub>3</sub>                | [M+NH <sub>4</sub> ] <sup>+</sup>                  | 3-Oxodecanoic acid                                                                | HMDB0010724                |
| 205.0968                   | 205.0972                  | 2.0905         | C <sub>11</sub> H <sub>12</sub> N <sub>2</sub> O <sub>2</sub> | [M+H] <sup>+</sup>                                 | L-Tryptophan                                                                      | HMDB0000929                |
| 212.0194                   | 212.0186                  | 3.9605         | C <sub>17</sub> H <sub>14</sub> O <sub>10</sub>               | [M+2Na] <sup>2+</sup>                              | 3,4,5-trihydroxy-6-({7-oxo-7H-furo[3,2-g]chromen-4-yl}oxy)oxane-2-carboxylic acid | HMDB0129424                |
| 216.9223                   | 216.9235                  | 5.3105         | C <sub>6</sub> H <sub>5</sub> BrO                             | [M+2Na-H] <sup>+</sup>                             | Bromobenzene-2,3-oxide                                                            | HMDB0060446                |
| 222.1825                   | 222.1818                  | 3.3346         | C <sub>9</sub> H <sub>21</sub> N <sub>2</sub> O <sub>3</sub>  | [M+NH <sub>4</sub> ] <sup>+</sup>                  | 3-Hydroxy-N <sub>6</sub> ,N <sub>6</sub> ,N <sub>6</sub> -trimethyl-L-lysine      | HMDB0001422                |
| 223.1690                   | 223.1693                  | 1.1791         | C <sub>28</sub> H <sub>44</sub> O <sub>4</sub>                | [M+2H] <sup>2+</sup>                               | MG(0:0/24:6(6Z,9Z,12Z,15Z,18Z,21Z)/0:0)                                           | HMDB0011560                |
| 226.9509                   | 226.9509                  | 0.1222         | C <sub>6</sub> H <sub>4</sub> Cl <sub>2</sub> O <sub>5</sub>  | [M+H] <sup>+</sup>                                 | 2,5-Dichloro-4-oxohex-2-enedioate                                                 | HMDB0060363                |
| 227.0827                   | 227.0827                  | 0.1228         | C <sub>13</sub> H <sub>14</sub> N <sub>2</sub> O <sub>4</sub> | [M+H-2H <sub>2</sub> O] <sup>+</sup>               | L-cis-Cyclo(aspartylphenylalanyl)                                                 | HMDB0031360                |
| 228.1954                   | 228.1954                  | 0.2184         | C <sub>27</sub> H <sub>54</sub> O <sub>2</sub>                | [M+2Na] <sup>2+</sup>                              | Heptacosanoic acid                                                                | HMDB0002063                |
| 249.1820                   | 249.1825                  | 1.9179         | C <sub>14</sub> H <sub>26</sub> O <sub>2</sub>                | [M+Na] <sup>+</sup>                                | 5-Tetradecenoic acid                                                              | HMDB0000499                |
| 263.0892                   | 263.0890                  | 0.6552         | C <sub>12</sub> H <sub>16</sub> O <sub>5</sub>                | [M+Na] <sup>+</sup>                                | 3-Carboxy-4-methyl-5-propyl-2-furanpropionic acid                                 | HMDB0061112                |
| 274.2738                   | 274.2741                  | 0.9690         | C <sub>16</sub> H <sub>32</sub> O <sub>2</sub>                | [M+NH <sub>4</sub> ] <sup>+</sup>                  | Palmitic acid                                                                     | HMDB0000220                |
| 277.0378                   | 277.0377                  | 0.5118         | C <sub>10</sub> H <sub>12</sub> O <sub>7</sub> S              | [M+H] <sup>+</sup>                                 | 3-[4-methoxy-3-(sulfooxy)phenyl]propanoic acid                                    | HMDB0131144                |
| 282.2788                   | 282.2791                  | 0.9242         | C <sub>18</sub> H <sub>35</sub> NO                            | [M+H] <sup>+</sup>                                 | Oleamide                                                                          | HMDB0002117                |
| 288.2167                   | 288.2169                  | 0.5696         | C <sub>15</sub> H <sub>29</sub> NO <sub>4</sub>               | [M+H] <sup>+</sup>                                 | Octanoylcarnitine                                                                 | HMDB0000791                |

|          |          |        |                                                                 |                           |                                                     |             |
|----------|----------|--------|-----------------------------------------------------------------|---------------------------|-----------------------------------------------------|-------------|
| 291.1929 | 291.1930 | 0.3379 | C <sub>15</sub> H <sub>26</sub> O                               | [M+H+HCOONa] <sup>+</sup> | Farnesol                                            | HMDB0004305 |
| 299.1097 | 299.1101 | 1.3015 | C <sub>12</sub> H <sub>20</sub> O <sub>7</sub>                  | [M+Na] <sup>+</sup>       | Triethyl citrate                                    | HMDB0034263 |
| 313.1544 | 313.1547 | 0.8975 | C <sub>18</sub> H <sub>20</sub> N <sub>2</sub> O <sub>3</sub>   | [M+H] <sup>+</sup>        | Phenylalanylphenylalanine                           | HMDB0013302 |
| 316.2473 | 316.2482 | 2.7037 | C <sub>17</sub> H <sub>33</sub> NO <sub>4</sub>                 | [M+H] <sup>+</sup>        | Decanoylcarnitine                                   | HMDB0000651 |
| 317.1786 | 317.1782 | 1.3222 | C <sub>47</sub> H <sub>82</sub> O <sub>15</sub> P <sub>2</sub>  | [M+3H] <sup>3+</sup>      | PGP(i-19:0/22:6(4Z,7Z,11E,13Z,15E,19Z)-2OH(10S,17)) | HMDB0275595 |
| 381.1300 | 381.1309 | 2.2685 | C <sub>20</sub> H <sub>22</sub> O <sub>6</sub>                  | [M+Na] <sup>+</sup>       | Sanshodiol                                          | HMDB0030573 |
| 383.1152 | 383.1160 | 1.9984 | C <sub>6</sub> H <sub>12</sub> O <sub>6</sub>                   | [2M+Na] <sup>+</sup>      | D-Glucose                                           | HMDB0000122 |
| 398.2559 | 398.2561 | 0.4509 | C <sub>41</sub> H <sub>77</sub> N <sub>2</sub> O <sub>8</sub> P | [M+H+K] <sup>2+</sup>     | SM(d16:1/20:3(8Z,11Z,14Z)-2OH(5,6))                 | HMDB0290273 |
| 542.3216 | 542.3217 | 0.1950 | C <sub>26</sub> H <sub>50</sub> NO <sub>7</sub> P               | [M+Na] <sup>+</sup>       | LysoPC(18:2(9Z,12Z)/0:0)                            | HMDB0010386 |
| 566.3207 | 566.3217 | 1.6956 | C <sub>28</sub> H <sub>50</sub> NO <sub>7</sub> P               | [M+Na] <sup>+</sup>       | LysoPC(20:4(5Z,8Z,11Z,14Z)/0:0)                     | HMDB0010395 |

**Table S13** Statistical information of annotated metabolites in urine samples.

| Compound Name                        | Adduct                                             | VIP  | f value | p value  | FDR      | Fisher's LSD                                                              |
|--------------------------------------|----------------------------------------------------|------|---------|----------|----------|---------------------------------------------------------------------------|
| L-Tryptophan                         | [M+H] <sup>+</sup>                                 | 1.53 | 6.44    | 4.63E-05 | 6.31E-05 | AS - SLE; AS - SS; HC - SLE; HC - SS; RA - SLE; RA - SS                   |
| Proline betaine                      | [M+ACN+Na] <sup>+</sup>                            | 2.73 | 28.65   | 1.47E-21 | 7.55E-21 | HC - AS; AS - SLE; AS - SS; HC - RA; HC - SLE; HC - SS; RA - SLE; RA - SS |
| Phosphocreatine                      | [M+NH <sub>4</sub> -H <sub>2</sub> O] <sup>+</sup> | 4.09 | 27.83   | 5.58E-21 | 2.72E-20 | HC - AS; AS - SLE; AS - SS; HC - RA; HC - SLE; HC - SS; RA - SLE          |
| Methyl (2E,6Z)-dodecadienoate        | [M+H] <sup>+</sup>                                 | 2.80 | 29.14   | 6.72E-22 | 3.49E-21 | HC - AS; RA - AS; HC - RA; HC - SLE; HC - SS; RA - SLE; RA - SS           |
| 5-Sulfosalicylic acid                | [M+NH <sub>4</sub> -H <sub>2</sub> O] <sup>+</sup> | 2.30 | 32.54   | 2.98E-24 | 1.79E-23 | HC - AS; HC - RA; HC - SLE; HC - SS; RA - SLE; RA - SS                    |
| 5-Hydroxy-L-tryptophan               | [M+H] <sup>+</sup>                                 | 2.97 | 21.51   | 1.89E-16 | 6.58E-16 | AS - SLE; AS - SS; HC - RA; HC - SLE; HC - SS; RA - SLE; RA - SS          |
| Dihydrolipoamide                     | [M+NH <sub>4</sub> ] <sup>+</sup>                  | 3.61 | 13.42   | 2.01E-10 | 4.62E-10 | AS - HC; AS - RA; AS - SLE; AS - SS; HC - RA; HC - SLE; HC - SS; RA - SLE |
| 3,7-Dimethyl-3-octene-1,2,6,7-tetrol | [M+Na] <sup>+</sup>                                | 4.21 | 63.50   | 8.68E-44 | 1.84E-42 | HC - AS; AS - SLE; AS - SS; HC - RA; HC - SLE; HC - SS; RA - SLE; RA - SS |
| Isoleucylproline                     | [M+H] <sup>+</sup>                                 | 5.79 | 25.50   | 2.50E-19 | 1.06E-18 | AS - RA; AS - SLE; AS - SS; HC - RA; HC - SLE; HC - SS; RA - SLE;         |

|                                             |                                      |       |        |          |          |  |                                                                              |
|---------------------------------------------|--------------------------------------|-------|--------|----------|----------|--|------------------------------------------------------------------------------|
|                                             |                                      |       |        |          |          |  | RA - SS                                                                      |
| Dodecanedioic acid                          | [M+H] <sup>+</sup>                   | 2.11  | 56.21  | 1.79E-39 | 3.00E-38 |  | HC - AS; AS - SLE; AS - SS; HC - RA; HC - SLE; HC - SS; RA - SLE             |
| Cerulenin                                   | [M+NH <sub>4</sub> ] <sup>+</sup>    | 1.25  | 11.64  | 4.58E-09 | 9.35E-09 |  | AS - SLE; AS - SS; HC - RA; HC - SLE; HC - SS; RA - SLE; RA - SS             |
| 28-Methyl-27-nonacosenoic acid              | [M+2Na] <sup>2+</sup>                | 2.40  | 50.62  | 4.73E-36 | 6.28E-35 |  | HC - AS; AS - SLE; AS - SS; HC - RA; HC - SLE; HC - SS; RA - SLE             |
| Creatinine                                  | [2M+Na] <sup>+</sup>                 | 1.25  | 37.69  | 9.79E-28 | 7.36E-27 |  | HC - AS; RA - AS; HC - RA; HC - SLE; HC - SS; RA - SLE; RA - SS              |
| TG(19:0/15:0/8:0)                           | [M+2H+Na] <sup>3+</sup>              | 1.89  | 130.94 | 1.57E-77 | 8.14E-76 |  | HC - AS; RA - AS; HC - RA; HC - SLE; HC - SS; RA - SLE; RA - SS              |
| PG(16:1(9Z)/PGJ2)                           | [M+3H] <sup>3+</sup>                 | 2.84  | 10.79  | 2.06E-08 | 3.86E-08 |  | HC - RA; HC - SLE; HC - SS                                                   |
| Myristoleic acid                            | [M+2Na-H] <sup>+</sup>               | 2.24  | 8.07   | 2.57E-06 | 3.98E-06 |  | AS - SLE; AS - SS; HC - RA; HC - SLE; HC - SS; RA - SLE; RA - SS             |
| Butenylcarnitine                            | [M+2Na-H] <sup>+</sup>               | 1.52  | 32.55  | 2.91E-24 | 1.76E-23 |  | HC - AS; AS - SLE; AS - SS; HC - RA; HC - SLE; HC - SS; RA - SLE;<br>RA - SS |
| TG(8:0/8:0/12:0)                            | [M+2Na] <sup>2+</sup>                | 14.27 | 30.99  | 3.47E-23 | 1.93E-22 |  | HC - AS; HC - RA; HC - SLE; HC - SS                                          |
| DG(a-25:0/PGF2alpha/0:0)                    | [M+3Na] <sup>3+</sup>                | 2.34  | 23.50  | 6.81E-18 | 2.65E-17 |  | HC - AS; HC - RA; HC - SLE; HC - SS                                          |
| PGP(i-14:0/20:4(6Z,8E,10E,14Z)-2OH(5S,12R)) | [M+2H+Na] <sup>3+</sup>              | 1.21  | 14.27  | 4.60E-11 | 1.10E-10 |  | AS - RA; AS - SLE; AS - SS; HC - RA; HC - SLE; HC - SS; RA - SLE;<br>RA - SS |
| TG(10:0/10:0/10:0)                          | [M+2Na] <sup>2+</sup>                | 5.07  | 41.70  | 2.22E-30 | 1.95E-29 |  | HC - AS; AS - SLE; HC - RA; HC - SLE; HC - SS; RA - SLE                      |
| DG(12:0/20:4(6E,8Z,11Z,14Z)+=O(5)/0:0)      | [M+2Na] <sup>2+</sup>                | 6.31  | 25.57  | 2.24E-19 | 9.60E-19 |  | HC - AS; HC - RA; HC - SLE; HC - SS                                          |
| 6Z-8-Hydroxygeraniol 8-O-glucoside          | [M+Na] <sup>+</sup>                  | 3.43  | 55.43  | 5.29E-39 | 8.39E-38 |  | HC - AS; RA - AS; HC - RA; HC - SLE; HC - SS; RA - SLE; RA - SS              |
| DG(18:0/PGE2/0:0)                           | [M+H+Na] <sup>2+</sup>               | 5.68  | 42.24  | 9.94E-31 | 9.15E-30 |  | HC - AS; AS - RA; AS - SLE; AS - SS; HC - RA; HC - SLE; HC - SS              |
| PE(15:0/18:3(6Z,9Z,12Z))                    | [M+H+NH <sub>4</sub> ] <sup>2+</sup> | 1.22  | 42.49  | 6.80E-31 | 6.37E-30 |  | HC - AS; AS - RA; AS - SLE; AS - SS; HC - RA; HC - SLE; HC - SS              |

**Table S14** Statistical information of annotated metabolites in serum samples.

| Compound Name                   | Adduct                  | VIP score | f value | p value  | FDR      | Fisher's LSD                                                    |
|---------------------------------|-------------------------|-----------|---------|----------|----------|-----------------------------------------------------------------|
| Patuletin                       | [M+2H+Na] <sup>3+</sup> | 1.39      | 89.90   | 3.36E-58 | 1.72E-57 | HC - AS; RA - AS; HC - RA; HC - SLE; HC - SS; RA - SLE; RA - SS |
| 3,4-Dihydroxybenzeneacetic acid | [M+H] <sup>+</sup>      | 1.31      | 10.30   | 4.91E-08 | 6.28E-08 | AS - RA; HC - RA; HC - SLE; HC - SS                             |

|                                                                                  |                                                    |       |        |          |          |                                                                           |
|----------------------------------------------------------------------------------|----------------------------------------------------|-------|--------|----------|----------|---------------------------------------------------------------------------|
| Indoleacrylic acid                                                               | [M+H] <sup>+</sup>                                 | 13.29 | 84.82  | 1.46E-55 | 6.72E-55 | HC - AS; HC - RA; HC - SLE; HC - SS; RA - SLE                             |
| Tridecanol                                                                       | [M+NH <sub>4</sub> -H <sub>2</sub> O] <sup>+</sup> | 1.88  | 178.75 | 1.38E-96 | 3.11E-95 | HC - AS; HC - RA; HC - SLE; HC - SS                                       |
| 2-Oxo-4-hydroxy-4-carboxy-5-ureidoimidazoline                                    | [M+NH <sub>4</sub> -H <sub>2</sub> O] <sup>+</sup> | 2.57  | 32.99  | 1.45E-24 | 2.55E-24 | HC - AS; HC - RA; HC - SLE; HC - SS                                       |
| 3-Oxodecanoic acid                                                               | [M+NH <sub>4</sub> ] <sup>+</sup>                  | 1.92  | 81.94  | 4.89E-54 | 2.02E-53 | HC - AS; RA - AS; HC - RA; HC - SLE; HC - SS; RA - SLE; RA - SS           |
| L-Tryptophan                                                                     | [M+H] <sup>+</sup>                                 | 5.91  | 72.85  | 4.20E-49 | 1.41E-48 | HC - AS; HC - RA; HC - SLE; HC - SS                                       |
| 3,4,5-trihydroxy-6-(7-oxo-7H-furo[3,2-g]chromen-4-yl)oxy)oxane-2-carboxylic acid | [M+2Na] <sup>2+</sup>                              | 1.55  | 3.78   | 4.87E-03 | 5.37E-03 | HC - AS; HC - RA; HC - SLE; HC - SS                                       |
| Bromobenzene-2,3-oxide                                                           | [M+2Na-H] <sup>+</sup>                             | 2.16  | 125.19 | 5.20E-75 | 4.54E-74 | HC - AS; HC - RA; HC - SLE; HC - SS; RA - SLE                             |
| 3-Hydroxy-N6,N6,N6-trimethyl-L-lysine                                            | [M+NH <sub>4</sub> ] <sup>+</sup>                  | 1.57  | 162.01 | 2.87E-90 | 4.44E-89 | HC - AS; HC - RA; HC - SLE; HC - SS                                       |
| MG(0:0/24:6(6Z,9Z,12Z,15Z,18Z,21Z)/0:0)                                          | [M+2H] <sup>2+</sup>                               | 1.85  | 82.26  | 3.30E-54 | 1.39E-53 | HC - AS; HC - RA; HC - SLE; HC - SS                                       |
| 2,5-Dichloro-4-oxohex-2-enedioate                                                | [M+H] <sup>+</sup>                                 | 7.96  | 126.24 | 1.78E-75 | 1.67E-74 | HC - AS; RA - AS; HC - RA; HC - SLE; HC - SS; RA - SLE; RA - SS           |
| L-cis-Cyclo(aspartylphenylalanyl)                                                | [M+H-2H <sub>2</sub> O] <sup>+</sup>               | 2.35  | 85.89  | 4.00E-56 | 1.90E-55 | HC - AS; HC - RA; HC - SLE; HC - SS; RA - SLE                             |
| Heptacosanoic acid                                                               | [M+2Na] <sup>2+</sup>                              | 1.34  | 135.43 | 1.84E-79 | 1.99E-78 | HC - AS; RA - AS; HC - RA; HC - SLE; HC - SS; RA - SLE                    |
| 5-Tetradecenoic acid                                                             | [M+Na] <sup>+</sup>                                | 2.44  | 42.30  | 9.07E-31 | 1.83E-30 | AS - HC; RA - AS; SLE - AS; RA - HC; SLE - HC; SS - HC; RA - SLE; RA - SS |
| 3-Carboxy-4-methyl-5-propyl-2-furanpropionic acid                                | [M+Na] <sup>+</sup>                                | 6.48  | 66.52  | 1.57E-45 | 4.66E-45 | HC - AS; HC - RA; HC - SLE; HC - SS; RA - SLE                             |
| Palmitic acid                                                                    | [M+NH <sub>4</sub> ] <sup>+</sup>                  | 1.98  | 30.01  | 1.66E-22 | 2.79E-22 | AS - HC; AS - RA; RA - HC; SLE - HC; SS - HC; SLE - RA; SS - RA           |
| 3-[4-methoxy-3-(sulfooxy)phenyl]propanoic acid                                   | [M+H] <sup>+</sup>                                 | 1.40  | 165.27 | 1.59E-91 | 2.61E-90 | HC - AS; HC - RA; HC - SLE; HC - SS                                       |
| Oleamide                                                                         | [M+H] <sup>+</sup>                                 | 2.46  | 75.77  | 1.04E-50 | 3.72E-50 | HC - AS; RA - AS; HC - RA; HC - SLE; HC - SS; RA - SS                     |
| Octanoylcarnitine                                                                | [M+H] <sup>+</sup>                                 | 1.32  | 92.93  | 9.70E-60 | 5.26E-59 | HC - AS; HC - RA; HC - SLE; HC - SS                                       |
| Farnesol                                                                         | [M+H+HCOONa] <sup>+</sup>                          | 3.75  | 90.08  | 2.75E-58 | 1.42E-57 | HC - AS; HC - RA; HC - SLE; HC - SS; RA - SLE; RA - SS                    |

|                                                     |                       |      |        |           |           |                                                        |
|-----------------------------------------------------|-----------------------|------|--------|-----------|-----------|--------------------------------------------------------|
| Triethyl citrate                                    | [M+Na] <sup>+</sup>   | 3.40 | 326.03 | 7.27E-141 | 1.97E-138 | HC - AS; HC - RA; HC - SLE; HC - SS; RA - SLE          |
| Phenylalanylphenylalanine                           | [M+H] <sup>+</sup>    | 4.38 | 44.85  | 2.05E-32  | 4.44E-32  | HC - AS; HC - RA; HC - SLE; HC - SS; RA - SLE          |
| Decanoylcarnitine                                   | [M+H] <sup>+</sup>    | 1.74 | 96.32  | 1.92E-61  | 1.13E-60  | HC - AS; HC - RA; HC - SLE; HC - SS                    |
| PGP(i-19:0/22:6(4Z,7Z,11E,13Z,15E,19Z)-2OH(10S,17)) | [M+3H] <sup>3+</sup>  | 1.57 | 170.09 | 2.31E-93  | 4.32E-92  | HC - AS; HC - RA; HC - SLE; HC - SS; RA - SLE          |
| Sanshodiol                                          | [M+Na] <sup>+</sup>   | 1.54 | 81.47  | 8.67E-54  | 3.51E-53  | HC - AS; HC - RA; HC - SLE; HC - SS                    |
| D-Glucose                                           | [2M+Na] <sup>+</sup>  | 1.62 | 95.05  | 8.26E-61  | 4.76E-60  | HC - AS; HC - RA; HC - SLE; HC - SS                    |
| SM(d16:1/20:3(8Z,11Z,14Z)-2OH(5,6))                 | [M+H+K] <sup>2+</sup> | 1.34 | 219.17 | 1.54E-110 | 7.01E-109 | HC - AS; HC - RA; HC - SLE; HC - SS; RA - SLE; RA - SS |
| LysoPC(18:2(9Z,12Z)/0:0)                            | [M+Na] <sup>+</sup>   | 1.59 | 42.75  | 4.64E-31  | 9.46E-31  | HC - AS; HC - RA; HC - SLE; HC - SS; RA - SLE          |
| LysoPC(20:4(5Z,8Z,11Z,14Z)/0:0)                     | [M+Na] <sup>+</sup>   | 1.75 | 73.50  | 1.85E-49  | 6.32E-49  | HC - AS; RA - AS; HC - RA; HC - SLE; HC - SS; RA - SLE |

---

**Table S15** Metrics of classifiers for autoimmune diseases versus healthy controls (ADs vs HC) with urine metabolites panel (training cohort).

| Model                  | AUC   | Accuracy | F1    | Precision | Recall |
|------------------------|-------|----------|-------|-----------|--------|
| Neural Network         | 0.994 | 0.979    | 0.979 | 0.979     | 0.979  |
| Random Forest          | 0.993 | 0.955    | 0.955 | 0.955     | 0.955  |
| Support Vector Machine | 0.989 | 0.965    | 0.965 | 0.966     | 0.965  |
| Logistic Regression    | 0.953 | 0.888    | 0.889 | 0.890     | 0.888  |
| k-Nearest Neighbor     | 0.953 | 0.872    | 0.868 | 0.873     | 0.872  |
| AdaBoost               | 0.937 | 0.944    | 0.944 | 0.944     | 0.944  |
| Naive Bayes            | 0.889 | 0.805    | 0.806 | 0.806     | 0.805  |

**Table S16** Metrics of classifiers for autoimmune diseases versus healthy controls (ADs vs HC) with urine metabolites panel (testing cohort).

| Model                  | AUC   | Accuracy | F1    | Precision | Recall |
|------------------------|-------|----------|-------|-----------|--------|
| Naive Bayes            | 0.996 | 0.966    | 0.966 | 0.967     | 0.966  |
| Neural Network         | 0.994 | 0.954    | 0.953 | 0.957     | 0.954  |
| Support Vector Machine | 0.981 | 0.954    | 0.953 | 0.957     | 0.954  |
| Random Forest          | 0.978 | 0.937    | 0.936 | 0.937     | 0.937  |
| k-Nearest Neighbor     | 0.960 | 0.902    | 0.897 | 0.915     | 0.902  |
| AdaBoost               | 0.769 | 0.822    | 0.815 | 0.819     | 0.822  |
| Logistic Regression    | 0.724 | 0.776    | 0.758 | 0.774     | 0.776  |

**Table S17** Metrics of classifiers for autoimmune diseases versus healthy controls (ADs vs HC) with serum metabolites panel (training cohort).

| Model                  | AUC   | Accuracy | F1    | Precision | Recall |
|------------------------|-------|----------|-------|-----------|--------|
| Logistic Regression    | 1.000 | 0.997    | 0.997 | 0.997     | 0.997  |
| Neural Network         | 1.000 | 0.995    | 0.995 | 0.995     | 0.995  |
| Random Forest          | 1.000 | 0.995    | 0.995 | 0.995     | 0.995  |
| Support Vector Machine | 1.000 | 0.989    | 0.989 | 0.990     | 0.989  |
| k-Nearest Neighbor     | 0.998 | 0.981    | 0.981 | 0.982     | 0.981  |
| Naive Bayes            | 0.998 | 0.963    | 0.963 | 0.966     | 0.963  |
| AdaBoost               | 0.982 | 0.984    | 0.984 | 0.984     | 0.984  |

**Table S18** Metrics of classifiers for autoimmune diseases versus healthy controls (ADs vs HC) with serum metabolites panel (testing cohort).

| Model                  | AUC   | Accuracy | F1    | Precision | Recall |
|------------------------|-------|----------|-------|-----------|--------|
| Random Forest          | 1.000 | 0.966    | 0.966 | 0.969     | 0.966  |
| Neural Network         | 1.000 | 0.937    | 0.938 | 0.947     | 0.937  |
| Naive Bayes            | 1.000 | 0.776    | 0.782 | 0.867     | 0.776  |
| k-Nearest Neighbor     | 0.971 | 0.920    | 0.921 | 0.929     | 0.920  |
| Logistic Regression    | 0.953 | 0.897    | 0.898 | 0.906     | 0.897  |
| Support Vector Machine | 0.949 | 0.920    | 0.921 | 0.935     | 0.920  |
| AdaBoost               | 0.939 | 0.943    | 0.943 | 0.943     | 0.943  |

**Table S19** Metrics of classifiers for autoimmune diseases versus healthy controls (ADs vs HC) with fusion model of metabolites panel (training cohort).

| Model                  | AUC   | Accuracy | F1    | Precision | Recall |
|------------------------|-------|----------|-------|-----------|--------|
| Support Vector Machine | 1.000 | 1.000    | 1.000 | 1.000     | 1.000  |
| Random Forest          | 1.000 | 0.995    | 0.995 | 0.995     | 0.995  |
| Neural Network         | 1.000 | 1.000    | 1.000 | 1.000     | 1.000  |
| Logistic Regression    | 1.000 | 0.992    | 0.992 | 0.992     | 0.992  |
| Naive Bayes            | 1.000 | 0.984    | 0.984 | 0.985     | 0.984  |
| AdaBoost               | 0.982 | 0.984    | 0.984 | 0.984     | 0.984  |
| k-Nearest Neighbor     | 0.972 | 0.893    | 0.890 | 0.896     | 0.893  |

**Table S20** Metrics of classifiers for autoimmune diseases versus healthy controls (ADs vs HC) with fusion model of metabolites panel (testing cohort).

| Model                  | AUC   | Accuracy | F1    | Precision | Recall |
|------------------------|-------|----------|-------|-----------|--------|
| Support Vector Machine | 1.000 | 0.989    | 0.989 | 0.989     | 0.989  |
| Naive Bayes            | 1.000 | 0.891    | 0.894 | 0.918     | 0.891  |
| Neural Network         | 1.000 | 0.971    | 0.972 | 0.974     | 0.971  |
| Random Forest          | 0.993 | 0.954    | 0.954 | 0.954     | 0.954  |
| k-Nearest Neighbor     | 0.985 | 0.937    | 0.936 | 0.937     | 0.937  |
| AdaBoost               | 0.952 | 0.960    | 0.960 | 0.960     | 0.960  |
| Logistic Regression    | 0.883 | 0.897    | 0.897 | 0.897     | 0.897  |

**Table S21** Metrics of classifiers for the distinction of four autoimmune diseases (ADs) and healthy controls (HC) with urine metabolites panel.

| Model                  | AUC   | Accuracy | F1    | Precision | Recall |
|------------------------|-------|----------|-------|-----------|--------|
| Random Forest          | 0.998 | 0.961    | 0.961 | 0.961     | 0.961  |
| Neural Network         | 0.993 | 0.911    | 0.910 | 0.918     | 0.911  |
| Logistic Regression    | 0.992 | 0.939    | 0.939 | 0.939     | 0.939  |
| Support Vector Machine | 0.980 | 0.844    | 0.844 | 0.856     | 0.844  |
| k-Nearest Neighbor     | 0.946 | 0.706    | 0.705 | 0.707     | 0.706  |
| Naive Bayes            | 0.941 | 0.700    | 0.706 | 0.723     | 0.700  |
| AdaBoost               | 0.931 | 0.889    | 0.889 | 0.895     | 0.889  |

AS vs SS vs SLE vs RA vs HC, AS: ankylosing spondylitis, SS: sicca syndrome, SLE: systemic lupus erythematosus, RA: rheumatoid arthritis.

**Table S22** Metrics of classifiers for the distinction of four autoimmune diseases (ADs) and healthy controls (HC) with serum metabolites panel.

| Model                  | AUC   | Accuracy | F1    | Precision | Recall |
|------------------------|-------|----------|-------|-----------|--------|
| Random Forest          | 0.974 | 0.833    | 0.832 | 0.834     | 0.833  |
| Neural Network         | 0.962 | 0.800    | 0.801 | 0.806     | 0.800  |
| k-Nearest Neighbor     | 0.920 | 0.589    | 0.576 | 0.574     | 0.589  |
| Support Vector Machine | 0.908 | 0.594    | 0.604 | 0.638     | 0.594  |
| Naive Bayes            | 0.860 | 0.561    | 0.533 | 0.575     | 0.561  |
| AdaBoost               | 0.858 | 0.772    | 0.772 | 0.773     | 0.772  |
| Logistic Regression    | 0.820 | 0.644    | 0.641 | 0.642     | 0.644  |

AS vs SS vs SLE vs RA vs HC, AS: ankylosing spondylitis, SS: sicca syndrome, SLE: systemic lupus erythematosus, RA: rheumatoid arthritis.

**Table S23** Metrics of classifiers for the distinction of four autoimmune diseases (ADs) and healthy controls (HC) with fusion model of metabolites panel.

| Model                  | AUC   | Accuracy | F1    | Precision | Recall |
|------------------------|-------|----------|-------|-----------|--------|
| Neural Network         | 0.999 | 0.972    | 0.972 | 0.973     | 0.972  |
| Logistic Regression    | 0.995 | 0.956    | 0.956 | 0.956     | 0.956  |
| Random Forest          | 0.994 | 0.967    | 0.967 | 0.971     | 0.967  |
| Support Vector Machine | 0.992 | 0.883    | 0.884 | 0.897     | 0.883  |
| Naive Bayes            | 0.972 | 0.817    | 0.814 | 0.821     | 0.817  |
| AdaBoost               | 0.948 | 0.917    | 0.917 | 0.918     | 0.917  |
| k-Nearest Neighbor     | 0.941 | 0.694    | 0.697 | 0.703     | 0.694  |

AS vs SS vs SLE vs RA vs HC, AS: ankylosing spondylitis, SS: sicca syndrome, SLE: systemic lupus erythematosus, RA: rheumatoid arthritis.

1. G. Della Sala, A. Mangoni, V. Costantino and R. Teta, *Frontiers in Chemistry*, 2020, **8**.
